# Supplementary material for: Valsartan attenuates LPS-induced ALI by modulating NF-κB and MAPK pathways
Source: Front Pharmacol. 2024 Jan 15;15:1321095. doi: 10.3389/fphar.2024.1321095 (PMC10822936; doi:10.3389/fphar.2024.1321095)
Supplement: Supplementary file 27 [file Table1.XLSX]

## Sheet: Sheet1
Fig1
Fig1B：	Cell viability (relative value)				Fig1C:	Cell viability (relative value)				Fig1D:	Cell viability (relative value)
Val(μM)					LPS(µg/ml)					LPS(μg/ml）	Val（μM)
0(μM)	1	1	1		0(µg/ml)	1	1	1		0(μg/ml）	0（μM)	1	1	1
20(μM)	1.03611	0.858116	1.02118		10(µg/ml)	1.11905	1.04008	1.15236		50(μg/ml）	0（μM)	0.695322	0.349752	0.435404
40(μM)	1.0521	0.984859	0.965694		30(µg/ml)	1.13047	1.11305	1.13538		50(μg/ml）	20（μM)	0.708322	0.73568	0.762297
80(μM)	1.11626	1.03071	1.03505		50(µg/ml)	0.688267	0.649321	0.608064		50(μg/ml）	40（μM)	0.889047	0.884275	0.85519
100(μM)	0.970882	0.964423	0.948117		100(µg/ml)	0.510736	0.267886	0.287106		50(μg/ml）	80（μM)	1.02168	0.983627	0.963797
Fig2
Fig2B:	Lung injury score
LPS(mg/kg)	Val(mg/kg)
0(mg/kg)	0(mg/kg)	0	0	0.34	0.34	0.34	0.14	0.2	0.48	0.34	0.2	0	0	0.2	0.34	0.28	0.34	0.14	0.34	0	0
5(mg/kg)	0(mg/kg)	0.86	0.93	0.84	0.84	1	0.98	1	1	1	1	1	1	1	1	0.86	0.93	1	0.77	0.84	1
5(mg/kg)	10(mg/kg)	0.84	0.84	0.75	0.7	0.84	0.7	0.84	0.89	0.98	0.77	0.84	0.84	0.84	0.68	0.41	0.2	0.86	0.82	0.48	0.48
5(mg/kg)	30(mg/kg)	0.82	0.68	0.5	0.98	0.62	0.62	0.62	0.55	0.69	0.54	0.82	0.48	0.48	0.55	0.28	0.77	0.7	0.98	0.68	0.48
Fig2C:	Weight loss（g）								Fig2D:	Total protein in BALF(mg/ml)
LPS(mg/kg)	Val(mg/kg)								LPS(mg/kg)	Val(mg/kg)
0(mg/kg)	0(mg/kg)	0.06	-0.57	0.5	-0.21	-0.52	0.25		0(mg/kg)	0(mg/kg)	0.239899	0.234842	0.21591	0.247587	0.258707	0.25048
5(mg/kg)	0(mg/kg)	3.64	3.45	3.79	2.9	3.1	3.82		5(mg/kg)	0(mg/kg)	0.362001	0.366293	0.361929	0.302903	0.333333	0.392227
5(mg/kg)	10(mg/kg)	3.42	3.68	3.4	2.92	2.76	2.75		5(mg/kg)	10(mg/kg)	0.267579	0.255707	0.255644	0.236736	0.316147	0.280747
5(mg/kg)	30(mg/kg)	2.35	2.3	2.76	2.65	3.22	1.9		5(mg/kg)	30(mg/kg)	0.272827	0.29756	0.274504	0.297227	0.256794	0.29128
Fig2E:	Total cell in BALF(x105/ml)
LPS(mg/kg)	Val(mg/kg)
0(mg/kg)	0(mg/kg)	9.47	9.53	8.76	7	5.2	5.4
5(mg/kg)	0(mg/kg)	15.1	11.9	17	9.3	16.4	11.7
5(mg/kg)	10(mg/kg)	10.23	12.21	7.2	13.5	15	17
5(mg/kg)	30(mg/kg)	12.1	6.2	10	9.8	5.4	3.2
Fig3
Fig3C:	BALF neutrophils（%）								Fig3D:	BALF Neutrophils（X105/ml)
LPS(mg/kg)	Val(mg/kg)								LPS(mg/kg)	Val(mg/kg)
0(mg/kg)	0(mg/kg)	0.024	0.058	0	0	0	0.54		0(mg/kg)	0(mg/kg)	0.009865	0.000218	0.503092	0	0	0
5(mg/kg)	0(mg/kg)	93.3	92.9	91	92.1	91.8	92.3		5(mg/kg)	0(mg/kg)	5.27483	8.16102	8.57548	8.96749	7.61616	7.55133
5(mg/kg)	10(mg/kg)	87.5	79.7	90.8	84.5	87	84.1		5(mg/kg)	10(mg/kg)	3.27938	3.42018	2.97799	0.597409	0.836794	4.11171
5(mg/kg)	30(mg/kg)	87.9	85.8	85.6	89.2	89.8	90.4		5(mg/kg)	30(mg/kg)	2.62542	0.035404	1.09545	1.9013	1.35761	2.82212
Fig3E:	Lung neutrophils（%）								Fig3F:	Lung neutrophils（X106/ml）
LPS(mg/kg)	Val(mg/kg)								LPS(mg/kg)	Val(mg/kg)
0(mg/kg)	0(mg/kg)	9.47	19.4	7.87	13	9.95	16.1		0(mg/kg)	0(mg/kg)	0.253559	0.201077	0.22439	0.208032	0.128325	0.397242
5(mg/kg)	0(mg/kg)	55.9	63	60.8	61.1	59.8	63.1		5(mg/kg)	0(mg/kg)	2.53181	2.51365	2.13117	1.84947	1.61297	1.83541
5(mg/kg)	10(mg/kg)	53.9	49.6	44.8	51.8	49	52.9		5(mg/kg)	10(mg/kg)	0.91051	0.8987	1.70762	1.60702	1.19554	0.501776
5(mg/kg)	30(mg/kg)	45.7	52.9	48.9	52.7	56	51.6		5(mg/kg)	30(mg/kg)	0.903144	1.08136	0.536767	0.42691	1.40027	1.01251
Fig4
Fig4A:	TNF-α mRNA （fold） BEAS-2B cells					Fig4B:	IL-1β mRNA（fold）BEAS-2B cells					Fig4C:	IL-6 mRNA（fold）BEAS-2B cells
LPS(μg/ml）	Val（μM)					LPS(μg/ml）	Val（μM)					LPS(μg/ml）	Val（μM)
0(μg/ml）	0（μM)	1	1	1		0(μg/ml）	0（μM)	1	1	1		0(μg/ml）	0（μM)	1	1	1
10(μg/ml）	0（μM)	1.68248	1.74756	1.65245		10(μg/ml）	0（μM)	3.55019	2.79582	3.93328		10(μg/ml）	0（μM)	1.76872	1.56235	2.26075
10(μg/ml）	20（μM)	0.551136	0.597504	0.476326		10(μg/ml）	20（μM)	1.4311	1.58782	1.59669		10(μg/ml）	20（μM)	1.20293	1.06692	1.3031
10(μg/ml）	40（μM)	1.22403	1.12214	1.02375		10(μg/ml）	40（μM)	1.22365	0.914061	0.886813		10(μg/ml）	40（μM)	0.348989	0.555232	0.442952
10(μg/ml）	80（μM)	0.431208	0.466419	0.486506		10(μg/ml）	80（μM)	0.567656	0.66522	0.499954		10(μg/ml）	80（μM)	0.727238	0.563315	0.31294
Fig4 D:	TNF-α mRNA （fold） mice								Fig4E：	IL-1β mRNA（fold) mice
LPS(mg/kg)	Val(mg/kg)								LPS(mg/kg)	Val(mg/kg)
0(mg/kg)	0(mg/kg)	1.30628	0.755297	0.865519	1.18264	1.00455	0.9857		0(mg/kg)	0(mg/kg)	0.712139	0.949644	1.11134	1.05104	0.955598	1.32475
5(mg/kg)	0(mg/kg)	6.03	6.14	5.2	4.73	5.84	5.45		5(mg/kg)	0(mg/kg)	15.8346	18.0281	18.067	16.7716	20.4659	18.412
5(mg/kg)	10(mg/kg)	2.98	2.89	2.82	2.69	3.12	3.01		5(mg/kg)	10(mg/kg)	5.65104	5.32302	5.60144	5.57618	6.6308	6.09406
5(mg/kg)	30(mg/kg)	3.49	3.41	4.06	3.17	3.47	3.87		5(mg/kg)	30(mg/kg)	8.46641	8.60076	8.42296	9.3079	8.51419	9.44262
Fig4F:	IL-6 mRNA（fold）mice
LPS(mg/kg)	Val(mg/kg)
0(mg/kg)	0(mg/kg)	0.688706	1.18758	1.0788	1.50123	0.530821	1.42221
5(mg/kg)	0(mg/kg)	3.38572	5.05201	5.20523	4.92461	5.44784	3.82662
5(mg/kg)	10(mg/kg)	3.34408	3.16726	2.22604	3.40237	2.2339	2.40388
5(mg/kg)	30(mg/kg)	1.95024	2.28912	2.02315	2.39812	1.61256	1.92539
Fig5
Fig5A:	MDA(nmol/104 cells) BEAS-2B cells					Fig5B:	GSSG (μg/104 cells) BEAS-2B cells					Fig5C:	SOD (U/104 cells) BEAS-2B cells
LPS(μg/ml）	Val（μM)					LPS(μg/ml）	Val（μM)					LPS(μg/ml）	Val（μM)
0(μg/ml）	0（μM)	0.002136	0.002028	0.002093		0(μg/ml）	0（μM)	1.14205	2.05288	1.50269		0(μg/ml）	0（μM)	0.147669	0.147798	0.136215
10(μg/ml）	0（μM)	0.004286	0.003533	0.004737		10(μg/ml）	0（μM)	2.74149	4.6088	3.99171		10(μg/ml）	0（μM)	0.051728	0.066273	0.054961
10(μg/ml）	20（μM)	0.002447	0.002458	0.002523		10(μg/ml）	20（μM)	2.7598	4.22418	3.15757		10(μg/ml）	20（μM)	0.052289	0.053737	0.057049
10(μg/ml）	40（μM)	0.003082	0.002867	0.003071		10(μg/ml）	40（μM)	2.39564	3.71242	3.11922		10(μg/ml）	40（μM)	0.110751	0.129991	0.13043
10(μg/ml）	80（μM)	0.003006	0.002673	0.002705		10(μg/ml）	80（μM)	1.9338	1.9337	1.83869		10(μg/ml）	80（μM)	0.1103	0.128074	0.127017
Fig5D:	MDA (nmol/g) mice								Fig5E:	GSSG (μg/g) mice
LPS(mg/kg)	Val(mg/kg)								LPS(mg/kg)	Val(mg/kg)
0(mg/kg)	0(mg/kg)	55.1071	46.5474	47.6187	49.4757	39.0428	41.9468		0(mg/kg)	0(mg/kg)	33.6646	30.9317	28.1367	31.2422	30.4969	16.8944
5(mg/kg)	0(mg/kg)	87.4082	95.0795	82.4926	94.1621	84.6466	127.024		5(mg/kg)	0(mg/kg)	107.826	106.211	94.2857	72.9193	83.7267	79.441
5(mg/kg)	10(mg/kg)	85.7378	88.5596	77.2843	73.8897	122.829	62.8127		5(mg/kg)	10(mg/kg)	70.8696	48.6336	58.1988	90	38.7578	68.8199
5(mg/kg)	30(mg/kg)	51.6125	51.0748	36.5588	65.9318	50.4438	36.6766		5(mg/kg)	30(mg/kg)	49.8758	55.4037	29.3168	32.795	50.9938	38.4472
Fig5F:	SOD (U/g) mice
LPS(mg/kg)	Val(mg/kg)
0(mg/kg)	0(mg/kg)	2495.35	1893.11	3856.41	2756.18	2968.79	2227.98
5(mg/kg)	0(mg/kg)	778.209	438.187	507.115	576.477	651.343	718.075
5(mg/kg)	10(mg/kg)	705.69	710.067	777.299	811.496	843.426	759.63
5(mg/kg)	30(mg/kg)	2643.04	814.37	2725.83	3007.91	2366.14	2887.19
Fig6
Fig6B:	MUC5AC/Tubulin					Fig6C:	MUC5AC mRNA(fold)
LPS(μg/ml）	Val（μM)					LPS(μg/ml）	Val（μM)
0(μg/ml）	0（μM)	1	1	1		0(μg/ml）	0（μM)	1	1	1
10(μg/ml）	0（μM)	2.61652	2.41117	3.03103		10(μg/ml）	0（μM)	4.51201	5.94802	4.36041
10(μg/ml）	20（μM)	1.55778	1.41801	2.59312		10(μg/ml）	20（μM)	2.59289	1.86213	1.52015
10(μg/ml）	40（μM)	0.89798	1.3598	1.69914		10(μg/ml）	40（μM)	1.34735	1.48351	2.01433
10(μg/ml）	80（μM)	1.18699	1.19116	2.0112		10(μg/ml）	80（μM)	0.503301	0.697033	0.86018
Fig6E:	MUC5AC/β-actin
LPS(mg/kg)	Val(mg/kg)
0(mg/kg)	0(mg/kg)	0.163791	0.08825	0.081273	0.197846	0.242371	0.175551
5(mg/kg)	0(mg/kg)	0.220857	0.224738	0.265473	0.497356	0.497799	0.472538
5(mg/kg)	10(mg/kg)	0.044632	0.042162	0.046108	0.105943	0.096514	0.087757
5(mg/kg)	30(mg/kg)	0.130233	0.137556	0.134413	0.212847	0.239119	0.210374
Fig8
BEAS-2B cells
Fig8C：	P-P65/P65					Fig8D：	P-P38/P38					Fig8E：	P-JNK/JNK					Fig8F：	P-ERK/ERK
LPS(μg/ml）	Val（μM)					LPS(μg/ml）	Val（μM)					LPS(μg/ml）	Val（μM)					LPS(μg/ml）	Val（μM)
0(μg/ml）	0（μM)	1	1	1		0(μg/ml）	0（μM)	1	1	1		0(μg/ml）	0（μM)	1	1	1		0(μg/ml）	0（μM)	1	1	1
10(μg/ml）	0（μM)	1.98208	1.82517	1.87001		10(μg/ml）	0（μM)	2.18965	2.29052	2.54379		10(μg/ml）	0（μM)	1.54235	1.67425	1.97243		10(μg/ml）	0（μM)	1.20571	1.20571	1.4234
10(μg/ml）	20（μM)	1.71784	1.193	1.30201		10(μg/ml）	20（μM)	1.5194	1.70345	1.43406		10(μg/ml）	20（μM)	1.06953	1.41763	1.47801		10(μg/ml）	20（μM)	1.07284	1.07284	1.21797
10(μg/ml）	40（μM)	1.35044	1.10307	0.930751		10(μg/ml）	40（μM)	1.36546	1.76032	1.53932		10(μg/ml）	40（μM)	1.21997	1.28995	1.35183		10(μg/ml）	40（μM)	0.997639	0.997639	0.967566
10(μg/ml）	80（μM)	1.2331	1.28477	1.2351		10(μg/ml）	80（μM)	0.523943	1.06284	1.27778		10(μg/ml）	80（μM)	1.0612	0.833627	1.16314		10(μg/ml）	80（μM)	0.992523	0.992523	1.00763
mice
Fig8I：	P-P65/P65								Fig8J：	P-P38/P38
LPS(mg/kg)	Val(mg/kg)								LPS(mg/kg)	Val(mg/kg)
0(mg/kg)	0(mg/kg)	0.39643	0.44381	0.448019	0.705396	0.657392	0.568934		0(mg/kg)	0(mg/kg)	0.306176	0.385917	0.422792	0.480472	0.387702	0.28723
5(mg/kg)	0(mg/kg)	0.90101	1.1323	1.12879	1.3204	1.29439	1.26835		5(mg/kg)	0(mg/kg)	0.759338	1.24038	1.66637	0.598295	0.762734	0.709858
5(mg/kg)	10(mg/kg)	1.07872	1.15492	1.11187	0.864414	0.876415	1.22843		5(mg/kg)	10(mg/kg)	0.981853	0.844224	0.653282	0.370075	0.579484	0.341633
5(mg/kg)	30(mg/kg)	0.89685	0.86358	0.715651	0.919916	0.855847	0.93137		5(mg/kg)	30(mg/kg)	0.45453	0.473013	0.681274	0.199393	0.274857	0.361306
Fig8K：	P-JNK/JNK								Fig8L：	P-ERK/ERK
LPS(mg/kg)	Val(mg/kg)								LPS(mg/kg)	Val(mg/kg)
0(mg/kg)	0(mg/kg)	0.353195	0.377776	0.281246	0.330297	0.655655	0.367101		0(mg/kg)	0(mg/kg)	0.928267	0.954218	1.05358	0.391033	0.640348	0.679539
5(mg/kg)	0(mg/kg)	0.686695	0.755998	0.484963	0.849651	1.10159	0.697006		5(mg/kg)	0(mg/kg)	1.5905	1.06704	0.991302	1.63684	1.1834	1.03646
5(mg/kg)	10(mg/kg)	0.334157	0.479007	0.410579	0.298435	0.355057	0.583945		5(mg/kg)	10(mg/kg)	0.413077	0.301862	0.468861	0.764835	0.954687	0.89639
5(mg/kg)	30(mg/kg)	0.446429	0.296685	0.268721	0.526502	0.61089	0.569306		5(mg/kg)	30(mg/kg)	0.569293	0.767042	0.514796	0.511567	0.780247	0.57209
